# Supplementary material
Source: MDPI journal article supplement (https://www.mdpi.com/1999-4907/14/4/840)
Supplement: s1 [file s1]

## Supplementary Materials

# Age Estimation of *Dracaena cinnabari* Balf. f. on Socotra Island: A Direct Method to Determine Its Lifespan

Lucie Bauerová \*, Petr Maděra, Martin Šenfeldr and Hana Habrová

Department of Forest Botany, Dendrology and Geobiocoenology, Faculty of Forestry and Wood Technology, Mendel University in Brno, Zemědělská 1, 613 00 Brno, Czech Republic; petrmad@mendelu.cz (P.M.); martin.senfeldr@mendelu.cz (M.Š.); habrova@mendelu.cz (H.H.)

\* Correspondence: lucie.bauerova@mendelu.cz

**Table S1.** Different models and their explained variability (represented by  $R^2$ ). Abbreviations: dbhinc—10 years diameter at breast height increment, dbh—diameter at breast height, elv—tree elevation, slo—slope of the plot, asp—slope aspect, shap—plot shape, plot—plot as the factor.

| Model                       | Explanatory Variables | Significant Variables | Explained Variability- $R^2$ |
|-----------------------------|-----------------------|-----------------------|------------------------------|
| dbhinc~dbh                  | dbh                   | dbh                   | 0.05                         |
| dbhinc~dbh+elv+slo+asp+shap | dbh,elv,slo,asp,shap  | dbh, asp plot         | 0.08                         |
| dbhinc~dbh+plot             | dbh, plot             | dbh, plot             | 0.24                         |
